# Supplementary material for: A ferroelectrically modulated ultrasensitive two-dimensional perovskite phototransistor with zero-gate-bias
Source: Royal Society of Chemistry journal article supplement (doi:10.1039/d4nr04910a), 2025-01-01
Supplement: d4nr04910a1.pdf [file d4nr04910a1.pdf]

## Supporting Information

### Ferroelectrically modulated ultrasensitive two-dimensional perovskite phototransistor with zero-gate-bias

*Junyi She,<sup>a</sup> Hanlin Cen,<sup>b</sup> Zhiheng Shen,<sup>a</sup> Jianyu Wang,<sup>a</sup> Xin Liu,<sup>a</sup> Jun Xi,<sup>b</sup> Yonghong Cheng,<sup>a</sup> Guodong Meng<sup>\*a</sup>*

<sup>a</sup>State Key Laboratory of Electrical Insulation and Power Equipment, Xi'an Jiaotong University, Xi'an, 710049, China.

<sup>b</sup>School of Electronic Science and Engineering, Xi'an Jiaotong University, Xi'an, 710049, China.

Guodong Meng\* - Email: [gdmengxjtu@xjtu.edu.cn](mailto:gdmengxjtu@xjtu.edu.cn)

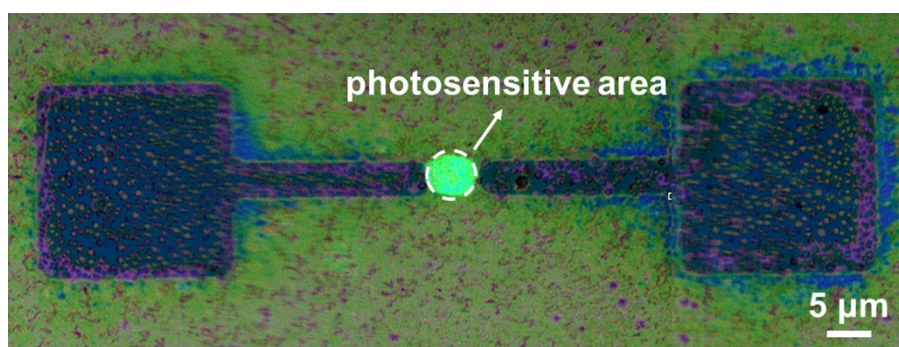

Fig. S1 Optical microscopy image of the fabricated phototransistor under illumination with a photosensitive area of  $28.5 \mu\text{m}^2$ .

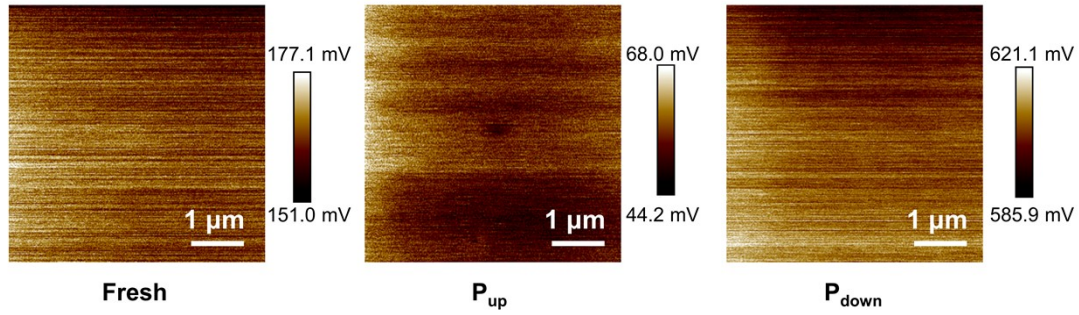

Fig. S2 Contact potential difference maps of  $(\text{PEA})_2\text{SnI}_4$  on  $\text{Al:HfO}_2$  ferroelectric film in Fresh (without polarization),  $P_{\text{up}}$  (upward polarization) and  $P_{\text{down}}$  (downward polarization) states through KPFM measurements.

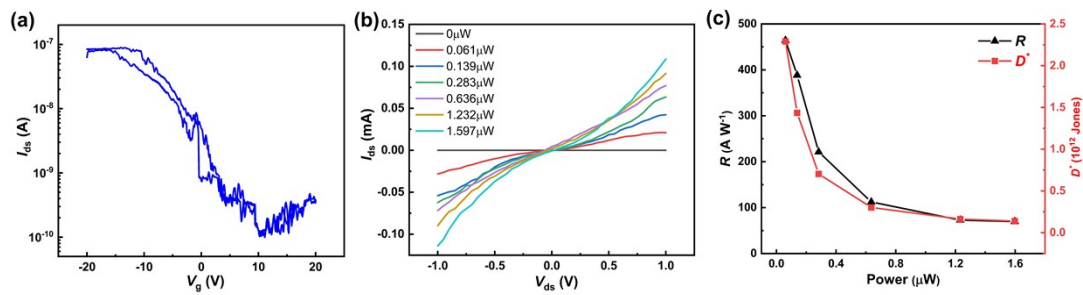

Fig. S3. Optoelectronic performances of  $\text{SiO}_2/(\text{PEA})_2\text{SnI}_4$  phototransistor. (a) Transfer curve of the proposed device. (b) Output curves under different illumination powers of the fabricated device. (c) Incident light power dependence of responsivity ( $R$ ) and detectivity ( $D^*$ ) at  $V_g=20$  V.

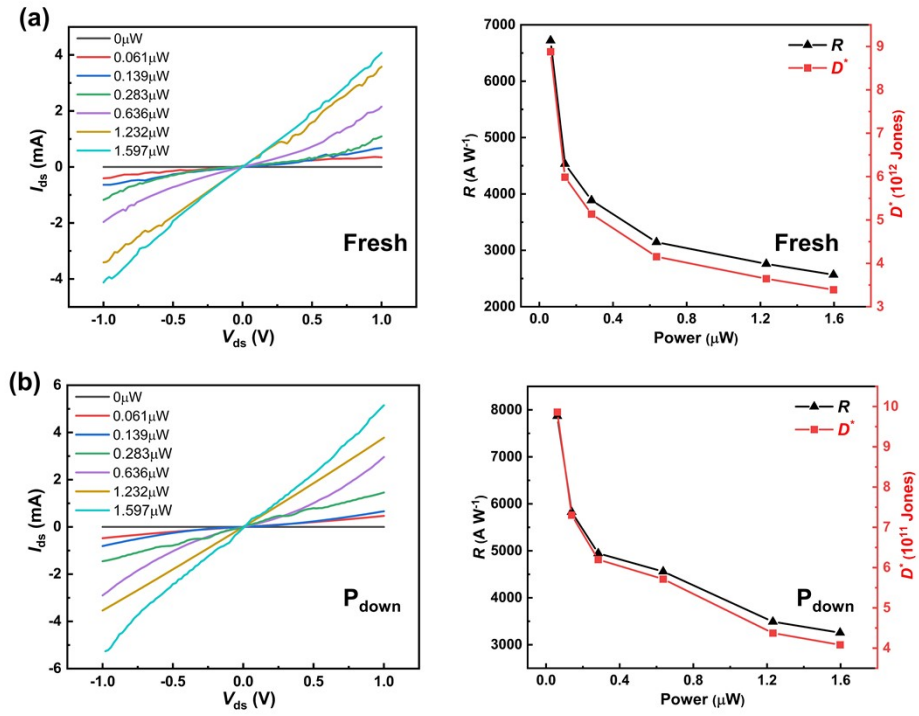

Fig. S4 Output curves of the ferroelectric-gated device under varied illumination powers, and the incident light power dependence of responsivity ( $R$ ) and detectivity ( $D^*$ ) in (a) Fresh (without polarization) and (b) P<sub>down</sub> (downward polarization) state, respectively.
